# Supplementary material for: Use of passive samplers as sewage surveillance tool to monitor a hepatitis A outbreak at a school in Amsterdam, the Netherlands, Oct 2022 – March 2023
Source: Research Square preprint supplement (doi:10.21203/rs.3.rs-3888277/v1), 2024-02-16
Supplement: Supplementary file 1 [file e3f925358fdceb3be2d1b14f.docx]

|  | | | | | | | | | | | |
| --- | --- | --- | --- | --- | --- | --- | --- | --- | --- | --- | --- |
| **Case** | **Age (years)** | **Sex** | **Region of origin†** | **Recent* travel history** | **Symptomatology** | **HAV vaccination status** | **Date start symptoms** | **Diagnostics** | | **HAV typing** |
| **Specimen taken** | **Specimen result** |
| 1 (index) | 5-8 | F | Eastern Mediterranean | Somalia | Jaundice, dark urine, discolored stool, fever, loss of appetite, nausea, fatigue | Not vaccinated | 15 Oct 2022 | 17 Oct 2022 | 18 Oct 2022 | Type 1B |
| 2 | 0-4 | F | Eastern Mediterranean | Morocco | Jaundice, abdominal pain, discolored stool | Not vaccinated | Unknown | 20 Oct 2022 | 20 Oct 2022 | Type 1B |
| 3 | 5-8 | M | Eastern Mediterranean | Morocco | Fever, diarrhea | Not vaccinated | 26 Sep 2022 | 20 Oct 2022 | 20 Oct 2022 | Type 1B |
| 4 | 9-12 | F | Eastern Mediterranean | Somalia | Fever | Not vaccinated | 15 Oct 2022 | 3 Nov 2022 | 3 Nov 2022 | Type 1B |
| 5 | 5-8 | M | Eastern Mediterranean | None reported | Jaundice, dark urine, discolored stool, loss of appetite, nausea | Not vaccinated | 19 Dec 2022 | 22 Dec 2022 | 27 Dec 2022 | Type 1B |
| †Continent of birth of at least one parent | | | | |  |  |  |  |  |  |
| *In last three months | | | | |  |  |  |  |  |  |
